# Supplementary material for: p53 mitotic centrosome localization preserves centrosome integrity and works as sensor for the mitotic surveillance pathway
Source: PubMed Central journal article supplement (PMC6838180; doi:10.1038/s41419-019-2076-1), 2019-11-07
Supplement: 41419_2019_2076_MOESM14_ESM.pdf [file 41419_2019_2076_MOESM14_ESM.pdf]

Please complete the table below to indicate the contributions of all named authors to the figures.

Figure 1:

|  |
|--|
|  |
|--|

Figure 2:

|  |
|--|
|  |
|--|

Figure 3:

|  |
|--|
|  |
|--|

Figure 4:

|  |
|--|
|  |
|--|

Figure 5:

|  |
|--|
|  |
|--|

Figure 6:

|  |
|--|
|  |
|--|

Signed for and on behalf of the Author(s):

|              |
|--------------|
| Silvia Soddu |
|--------------|

Print Name:

|  |
|--|
|  |
|--|

Date:

|  |
|--|
|  |
|--|
